# Supplementary material
Source: PubMed Central journal article supplement (PMC3367853)
Supplement: supp_nos084_nos084supp_table4.pdf [file supp_nos084_nos084supp_table4.pdf]

A

| specimen        | N  | % FL1 <sup>+</sup> cells (fresh) | SC culture p<5 | SC culture p5-10 | SC culture p>10 | FL1 MI < 10 <sup>4</sup> 3 | FL1 MI > 10 <sup>4</sup> 3 |
|-----------------|----|----------------------------------|----------------|------------------|-----------------|----------------------------|----------------------------|
| epileptic       | 15 | 1                                | 86.66%         | 13.33%           | 0.00%           | 100.00%                    | 0.00%                      |
| grade I tumor   | 4  | 1.56                             | 100.00%        | 0.00%            | 0.00%           | 100.00%                    | 0.00%                      |
| grade II tumor  | 14 | 1.68                             | 92.86%         | 7.14%            | 0.00%           | 100.00%                    | 0.00%                      |
| grade III tumor | 13 | 3.61                             | 76.92%         | 7.69%            | 23.08%          | 92.31%                     | 15.38%                     |
| grade IV tumor  | 43 | 4.2                              | 48.65%         | 21.62%           | 29.73%          | 81.08%                     | 18.92%                     |

B

|                                | Mice bearing tumor     |            |                        | % Mice bearing tumor   |            |                        |
|--------------------------------|------------------------|------------|------------------------|------------------------|------------|------------------------|
|                                | FL1 <sup>+</sup> cells | Pool cells | FL1 <sup>±</sup> cells | FL1 <sup>+</sup> cells | Pool cells | FL1 <sup>±</sup> cells |
| fresh cells or in vivo passage | 15/23                  | 54/56      | 0/10                   | 65%                    | 96.42%     | 0%                     |
| cultured cells                 | 43/43                  | 22/37      | 6/27                   | 100%                   | 78%        | 22%                    |
| <b>TOTAL</b>                   | 58/66                  | 76/93      | 6/37                   | 88%                    | 81.72%     | 18.2%                  |
